# Supplementary material for: Microbiological diagnosis and mortality of tuberculosis meningitis: Systematic review and meta-analysis
Source: PubMed Central journal article supplement (PMC9934382; doi:10.1371/journal.pone.0279203), 2023-02-16
Supplement: pone.0279203.s007.pdf [file pone.0279203.s007.pdf]

1 **Abstract**

2 **Background:** Tuberculosis (TB) which is caused by *Mycobacterium tuberculosis* poses a  
3 significant public health global treat. Tuberculosis meningitis (TBM) accounts for approximately  
4 1% of all active TB cases. The diagnosis of Tuberculosis meningitis is notably difficult due to its  
5 rapid onset, nonspecific symptoms, and the difficulty of detecting *Mycobacterium tuberculosis* in  
6 cerebrospinal fluid (CSF). In 2019, 78,200 adults died of TB meningitis. This study aimed to  
7 assess the microbiological diagnosis TB meningitis using CSF and estimated the risk of death  
8 from TBM.

9 **Methods:** Relevant electronic databases and gray literature sources were searched for studies  
10 that reported **presumed TBM patients**. The quality of included studies was assessed using the  
11 Joanna Briggs Institute Critical Appraisal tools designed for prevalence studies. Data were  
12 summarized using Microsoft excel ver 16. The proportion of culture confirmed TBM, prevalence  
13 of drug resistance and risk of death were calculated using the random-effect model. Stata using  
14 version 16.0 was used perform the statistical analysis. Moreover, subgroup analysis was  
15 conducted. .

16 **Results:** After systematic searching and quality assessment, 31 studies were included in the final  
17 analysis. Ninety percent of the included studies were retrospective studies in design. The overall  
18 pooled estimates of CSF culture positive TBM was 29.72% (95% CI; 21.42-38.02). The pooled  
19 prevalence of MDR-TB among culture positive TBM cases was 5.19% (95% CI; 3.12-7.25).  
20 While, the proportion of INH mono-resistance was 9.37% (95% CI; 7.03-11.71). The pooled  
21 estimate of mortality rate among TBM **cases** was 20.42% (95%CI; 14.81-26.03). Based on sub  
22 group analysis, the pooled **prevalence of mortality rate** among HIV positive and HIV negative  
23 TBM individuals was 53.39% (95%CI; 40.55-66.24) and 21.65% (95%CI;4.27-39.03)  
24 respectively.

25 **Conclusion:** Definite diagnosis of TBM still remains global **treat**. Microbiological confirmation  
26 of TBM is not always achievable. Early microbiological confirmation of TBM has great  
27 importance to reduce mortality. There was high rate of MDR-TB among **TBM** patients. All TB  
28 meningitis isolates should be cultured and drug susceptibility tested using standard techniques.

29 **Key points:** Tuberculosis meningitis, microbiological diagnosis, mortality, TB culture

## 30 Introduction

31 Tuberculosis(TB) poses a significant public health global threat, which is caused by  
32 *Mycobacterium tuberculosis*(Mtb) bacteria. According to the World Health Organization  
33 (WHO), in 2020, the number of people newly diagnosed with TB dropped to 5.8 million 10  
34 million cases of TB were detected with 1.3 million TB deaths among HIV-negative people and  
35 an additional 214 000 among HIV-positive people (1). Following a primary or post-primary  
36 pulmonary infection, *Mycobacterium tuberculosis* can attack any part of the body including the  
37 central nervous system. Tuberculosis meningitis(TBM) is the most common type of central  
38 nervous system TB. Some patients who have or have had tuberculosis may develop the rare  
39 complication known as tuberculous meningitis. Tuberculous meningitis accounts for  
40 approximately 1 % of all cases of active tuberculosis (2).

41 Southeast Asia and Africa accounted for 70% of global TBM incidence. WHO estimated that  
42 78,200 (95% UI; 52,300–104,000) adults died of TBM in 2019. Tuberculous Meningitis case  
43 fatal in those treated was on average 27% (3, 4). Besides, TBM can cause a diverse clinical  
44 picture including altered mental status, meningitic features, seizures, cranial nerve palsies, and  
45 focal neurological deficits (5). It is among severe diseases which account 5-10% of extra-  
46 pulmonary tuberculosis cases (2).

47 The disease involves the infection of the meninges of the host, which is caused by Mtb and other  
48 mycobacteria. Over half of TBM survivors have neurological disability (6). Patients with TBM  
49 usually required admission to the intensive care unit. The most predisposed populations to  
50 develop TBM are children under four years, the elderly and HIV-positive patients (7). The  
51 challenge TBM management concentrated on rapid reliable diagnosis, treatment and  
52 understanding of its pathogenesis. Drug resistance and HIV infection increase the difficulty of  
53 TBM management (8).

54 Following TB infection infants have an up to 20% risk of developing TBM. Over half of all  
55 children with tuberculosis in the world go undiagnosed or unreported. Tuberculous meningitis  
56 mostly develops within 2–6 months following primary pulmonary infections during childhood  
57 (9). To diagnose TBM in children MRI is superior to CT imaging but its high cost and need for  
58 infrastructure make difficult to use it (10). In children, Most of the time TBM presents as

59 subacute meningitis which makes it difficult to distinguish from other meningoencephalitis  
60 diseases (11).

61 The diagnosis of tuberculous meningitis is notably difficult due to its rapid onset, nonspecific  
62 symptom, and the difficulty of detecting *Mycobacterium tuberculosis* in cerebrospinal fluid  
63 (CSF) (12). The examination of the cerebrospinal fluid is the gold standard for diagnosing TBM.  
64 The identification of tuberculous bacilli in the CSF, either by smear examination or by culture, is  
65 required for a definitive diagnosis (13). Even though culture is the gold standard for diagnosing  
66 *Mycobacterium tuberculosis*, long time for *Mycobacterium* growth on *Mycobacterium* growth  
67 indicator tube (MGIT) and LJ medium may lead to a delay in diagnosis (14).

68 Tuberculosis meningitis diagnosis is challenging by several factors, particularly in low- and  
69 middle-income countries: first, CSF collection necessitates lumbar puncture; second, CSF  
70 processing necessitates adequate laboratory capacity; and finally, available laboratory diagnosis  
71 methods (smear microscopy, molecular tests such as Xpert MTB/RIF, or CSF culture) have  
72 moderate sensitivity (15). A lumbar puncture is performed by a doctor who is specially trained to  
73 collect CSF. In a diagnostic Lumbar Puncture, standard bedside aseptic procedures apply with  
74 no-touch technique. At this time there were obstacles in the diagnosis of TBM due to the absence  
75 of quick, reliable and affordable diagnostic tests. This study aims to assess the microbiological  
76 diagnosis of TBM using CSF and to estimate mortality rate from TBM.

## 77 **Methods**

### 78 **Protocol and Registration**

79 The protocol of this systematic review and meta-analysis was registered on the PROSPERO  
80 (International Prospective Register of Systematic Reviews), University of York. It was assigned  
81 a registration number CRD42022323629 .

### 82 **Literature Search**

83 Systematic literature searching was performed using the PubMed, EMBASE databases and gray  
84 literature to assess microbiological diagnosis and mortality of Tuberculosis meningitis. The  
85 Preferred Reporting Items for Systematic Reviews and Meta-Analysis (PRISMA) checklist (16)  
86 was used to conduct this systematic review and meta-analysis (Supplementary Table 1). There  
87 was no need for ethical approval because this study was based on previously published primary

88 investigations. The following key terms were used to extract the intended data: Tuberculosis,  
89 meningitis, Tuberculous meningitis, diagnosis, microbiological diagnosis bacteriologically  
90 confirmed, mortality, fatality, death and TB culture .

91 The search terms and their variations were used in combination. The Boolean operators AND  
92 and OR were used accordingly. Articles were limited to papers published in the English language  
93 without a limit of a published year. The final search included studies published up to May 1,  
94 2022.

### 95 **Selection criteria**

96 Included studies were: (1) original study on TBM **suspected** patients; (2) published in the English  
97 language without regard to a publication year; 3). having described microbiological diagnosis of  
98 tuberculous meningitis based on CSF Mycobacteriological culture result data. Additionally,  
99 included articles should be peer-reviewed, fulfilled the above listed inclusion criteria and  
100 adequately addresses the objective of the study. Studies with incomplete data, **studies not used**  
101 culture technique to diagnose TBM, and review articles, meta-analyses and duplicates were all  
102 excluded from the study. Two authors (GS and AA) search and **select** articles based on their title  
103 and abstract. Additionally, they **do** independent screening of the full text of the retrieved article  
104 to be included in the final analysis.

### 105 **Data extraction**

106 To collect pertinent data from each eligible study, a pre-designed Microsoft 2010 excel data  
107 extraction form was used. The extraction activity **was** carried out by two writers (GS and BD).  
108 The quality and completeness of the extracted data were also reviewed by the third Author (DF).  
109 The following information was extracted: initial author name; year of publication; country of  
110 study, study period, age of study participants; study design, sample size of participants, **mortality**  
111 **rate**, MDR-TB prevalence, and INH mono-resistance prevalence.

### 112 **Quality Assessment**

113 The Joanna Briggs Institute Critical Appraisal (JBI) techniques for prevalence studies were used  
114 to assess the quality of eligible papers (17). There are nine quality indicators on the JBI checklist  
115 for the prevalence study. These quality indicators were converted to 100%, and the quality score

116 was assessed as high if >80%, medium if 60–80%, and low if <60%. Two authors (GS and BD)  
117 carried out the quality assessment, while the third author handled the disagreement between the  
118 two authors (AA).

## 119 **Data Analysis**

120 Data were summarized and saved in Microsoft Excel 2016 before being exported to STATA  
121 Version 16.0 for analysis. All studies were pooled to estimate the risk of death of Tuberculosis  
122 meningitis suspected patients at any age. Subgroup analysis was done based on the age of study  
123 participants (children or adult), HIV status and study design. Heterogeneity among studies was  
124 examined using forest plots and  $I^2$  heterogeneity tests. In the current review,  $I^2 > 50\%$  a random  
125 effect model was used for analysis. Funnel plot and an Egger's test (p-value 0.1 as a significant  
126 level) to see if there was any potential for publication bias. The forest plot provides a visual  
127 inspection of the confidence intervals of effect sizes of individual studies. The presence of non-  
128 overlapping intervals suggests heterogeneity.

## 129 **Result**

### 130 **Eligible studies**

131 Using the study's search keyword, 1354 studies were found through a systematic search of  
132 electronic databases. After removing 1122 duplicate research, titles and abstracts were used to  
133 screen 232 publications. 174 studies were removed from the full-text review based on the  
134 abstract and title review. Only 31(18-48) papers were included in the final systematic review and  
135 meta-analysis after full-text review of 54 studies (Fig.1).

### 136 **Study characteristics**

137 There were 14 studies from Asia, eight from Europe, five from America, and only four (20, 26,  
138 27, and 36) studies from Africa (3 in South Africa and one in Uganda) . Ninety percent of the  
139 included studies were retrospective studies in design. The study period of the studies was from  
140 1985 to the earliest 2020. The range of sample sizes was 20(23) to 6762(36) study participants.  
141 Five studies (18, 20, 25, and 27, 32) were conducted on children under the age of 18 and seven  
142 studies were conducted on adults over the age of 18. The rest studies included all study

143 participants without discrimination on age. The total study participants of the included studies  
144 were 20,596 (Table 1).

145 Quality assessments of the included studies are provided in the supporting information (S.Table  
146 2). Ten studies (19, 21, 22,23,28,30,33,34,38 and 47) score medium quality based on JBI quality  
147 assessment checklist for prevalence studies. While most of the studies score high quality using  
148 JBI checklist for prevalence studies.

#### 149 **Microbiological diagnosis**

150 The overall pooled estimate of Tuberculosis meningitis confirmed by CSF culture was 29.72%  
151 (95 % CI; 21.42-38.02). The definite diagnosis rate was 29.72%, according to this . The  
152 lowest percentage of TBM confirmed by CSF culture was 1.64 % (22) and the highest  
153 percentage was 85.13 % (34) (Fig.2). Prevalence of definite TBM diagnosed by AFB microscopy  
154 was 10.04% (95% CI; 4.31-15.78) (Fig 3).

155 Only fourteen studies reported the drug resistance pattern of the CSF culture-positive isolates. A  
156 total of 2736 CSF Mycobacterium TB culture-positive isolates were tested for drug  
157 susceptibility. Fourteen studies (5 from india, 4 from china, 2 from south Africa, 1 from America, 1  
158 from Peru and 1 from Veitnam) were included to analyses the drug resistance pattern. MDR-  
159 TBM was found in 5.19 % of these isolates (95% CI: 3.12-7.25). (Fig.4). Eight studies reported  
160 the proportion of INH mono resistance from the above total isolates. INH mono-resistance was  
161 9.37 % (95% CI; 7.03-11.71) (Fig.5).

#### 162 **Mortality rate among TBM patients**

163 The proportion of TBM patients who died was reported in twenty-one studies. There were 1250  
164 deaths out of a total of 6896 TBM patients. The estimated mortality rate in TBM patients was  
165 20.42 % (95%CI; 14.81-26.03) (Fig.6).

#### 166 **Sub-group analysis of mortality among TBM patients**

167 A subgroup analysis of mortality rates by age, study design type, and HIV status yields estimates  
168 of 9.80 % (95 % CI;3.22-16.37) in children under the age of 18 and 24.82 % (95 %CI;17.05-  
169 32.59) in adults (greater than or equal to 18 years old); 20.34 % (95% CI;14.03-26.65) and 30.92  
170 % (95% CI;18.40-43.44) in retrospective and other study designs, respectively; 53.39

171 (95%CI;40.55-66.24) in HIV positive TBM patients and 21.65 (95%CI;4.27-39.03) among HIV  
172 negative TBM patients (Table.2).

## 173 **Discussion**

174 In this systematic review and meta-analysis the microbiological diagnosis of Tuberculosis  
175 meningitis and the risk of death among patients were calculated. According to the data around  
176 one-third of TBM patients had CSF microbiological (TB culture and AFB microscopy)  
177 confirmed illness. MDR-TB was found to be prevalent in TBM patients. The risk of death was  
178 significant among TB meningitis patients. As per the findings, one patient will die for every five  
179 TBM cases.

180 The culture confirmed diagnostic rate reported in this study (29.72%) was slightly near to the  
181 report (38.9%) of a previous study (49). It implies that three-fourth of TBM patients were got  
182 anti-TB treatment empirically. This finding was also in support with the reports of previous  
183 study which stated as in more than 50 per cent TBM patients, microbiological confirmation is not  
184 achieved This data indicated that conventional microbiological diagnosis of TBM tests has  
185 suboptimal positivity from CSF samples. Due to constrain of infrastructure and trained  
186 personnel, Worldwide there was a difficulty in diagnosing TBM using CSF. Junior doctors  
187 possess uncertainties regarding performing the procedure and frequently perform below  
188 expectations (50). Lumbar puncture (LP) is often not performed in sub-Saharan African and  
189 other resource-limited settings (51). Culture for *M. tuberculosis* performed on CSF had even lower  
190 positivity, producing a positive result in only approximately one in three cases (52).

191 Besides its longer turnaround time and inaccessibility, the lower positivity rate of CSF culture  
192 makes doubt its use as a gold standard diagnosis method for TBM. The positive rate of detection  
193 for the smear and culture tests is low alerting the globe to invest in rapid accurate and accessible  
194 diagnostic methods. Paucibacillarity of TBM makes it difficult to isolate *Mtb* in CSF by  
195 conventional culture methods. Even though rapid, sensitive and highly specific molecular  
196 detection methods have been favored, their cost and accessibility make early diagnosis of TBM  
197 difficult (53).

198 The lower positivity of CSF for *Mycobacterium tuberculosis* based on AF smear microscopy  
199 found in this meta-analysis was similar to other studies report which describe staining of CSF

200 smears for acid-fast bacilli has poor sensitivity (about 10% to 15%) (54). However, Smear  
201 microscopy is the most widely used rapid and inexpensive diagnostic test for TB, especially in  
202 low and middle-income countries. Based on this most TBM cases were not microbiologically  
203 confirmed.

204 This systematic review and meta-analysis study has shown that drug resistance in TBM is not an  
205 unusual occasion. The rate of MDR-TB and INH mono resistance was 5.19% and 9.37%  
206 respectively. Since most of the included studies to analyze drug resistance pattern were from  
207 Asia (5 from India, 4 from china and 1 from Vietnam), the result reflects drug resistance pattern  
208 in that specific region. This indicates that TBM has a high vulnerability to drug resistance. Thus  
209 with the difficulties of getting precious CFS samples from TBM suspected patients countries  
210 must include microbiological diagnosis of *Mycobacterium tuberculosis* in their national strategic  
211 plan and algorithm.

212 According to the findings, 20.03 % of TBM patients died during the course of their illness. It was  
213 consigned with the study finding of another study (55). Our sub-group analysis showed that the  
214 risk of death was higher among adults ( $\geq 18$  years) and HIV positive than their respective  
215 children ( $< 18$  years old) and HIV negative patients. Majority of the included studies were done  
216 after the initiation of antiretroviral treatment in most of developed and developing countries. The  
217 different mortality rate reported in this study among children and adults was against the reports  
218 of a previous single study (56) which reports a similar 7.03% mortality rate in both groups. This  
219 finding (mortality rate among children 9.8%) is lower than the report of previous systematic  
220 review and meta-analysis (57). which reported 19.3% mortality rate among children. It might be  
221 due to the previous study participants were HIV –infected children. Among adults, our study  
222 finding was consistent with the previous studies (49, 55).

223 According to this study, HIV-TBM co-infected individuals have a two-fold greater mortality rate  
224 than HIV-negative patients; mortality in HIV-negative TBM patients was 21.65%, compared to  
225 53.39 percent in HIV-positive TBM patients. A prior study (49) found a mortality rate of 53.4  
226 percent among adult HIV-positive TBM patients, which was similar to this. The HIV-infected  
227 person is at higher risk of developing disseminated extrapulmonary tuberculosis including TBM,  
228 particularly at a stage of more advanced immunosuppression (57). It has been reported that



229 tuberculosis patients co-infected with HIV were more likely to have poor treatment outcomes  
230 and death (58, 59).

231 There was a lot of heterogeneity between studies. We were able to find subgroup analysis based  
232 on the features of the included research, but we still don't know what caused the heterogeneity.  
233 Although we were unable to pinpoint the source of heterogeneity, the following factors could  
234 contribute to publication bias and heterogeneity: 1).We only considered research that was  
235 published in English; 2).the smallest sample size of the included studies was 20; and 3).the  
236 majority of the studies were retrospective.

237 **Our study has some limitations:** First, in this meta-analysis, we only included studies published  
238 in English. **Second, studies that did not use the gold standard TB culture for diagnosis were**  
239 **excluded. Third, due to**  **availability of data we cannot analyse mortality by Anti-retroviral**  
240 **treatment usage and CD4 count. Fourth, since, there was high heterogeneity of studies**  
241 **interpretation of results need attention.** 

## 242 **Conclusion**

243 Tuberculosis meningitis cannot always be confirmed microbiologically. There was high rate of  
244 mortality in tuberculosis meningitis patients. The importance of early microbiological  
245 confirmation of TBM in reducing mortality is enormous. TBM patients have a high prevalence  
246 of MDR-TB infection. Tuberculous meningitis should be diagnosed using rapid, sensitive, and  
247 specific molecular testing methods. All TB meningitis isolates should be cultured and drug  
248 susceptibility tested using standard techniques. To investigate this goal in greater depth,  
249 prospective studies with a bigger sample size were required.

## 250 **Acknowledgments**

251 Our great acknowledge goes to the author of primary studies included in this systematic review  
252 and meta-analyses.

253 **Conflict of Interest:** The authors declare that the research was conducted in the absence of any  
254 commercial or financial relationships that could be construed as a potential conflict of interest.

## 255 **Availability of Data**

256 Data were available based on the request of the authors

### 257 **Authors' contribution**

258 GS: conceptualization, data extraction and analysis, review manuscript

259 AA: review manuscript, data extraction and analysis

260 DF: review manuscript, data extraction and analysis

261 BD: data extraction, review manuscript

262

### 263 **References**

- 264 1. Global tuberculosis report 2021. Geneva: World Health Organization; 2021. Licence: CC  
265 BY-NC-SA 3.0 IGO
- 266 2. Thwaites G, Fisher M, Hemingway C, et al. British Infection Society guidelines for the  
267 diagnosis and treatment of tuberculosis of the central nervous system in adults and  
268 children. *J Infect.* 2009;59(3):167–87.
- 269 3. Dodd PJ, Osman M, Cresswell FV, Stadelman AM, Lan NH, Thuong NTT, et al. The  
270 global burden of tuberculous meningitis in adults: A modelling study. *PLOS Glob Public*  
271 *Health* 2021;1(12).
- 272 4. Cantier M, Morisot A, Guérot E, et al. Functional outcomes in adults with tuberculous  
273 meningitis admitted to the ICU: a multicenter cohort study. *Crit Care.* 2018;22(1):1-8.)
- 274 5. Thwaites GE, van Toorn R, Schoeman J. Tuberculous meningitis: more questions, still  
275 too few answers. *Lancet Neurol.* 2013; 12: 999–1010.
- 276 6. Chiang S., Khan F, Milstein M, Tolman A.W, Benedetti A.,Starke J.R, Becerra, M.C.  
277 Treatment outcomes of childhood tuberculous meningitis: A systematic review and meta-  
278 analysis. *Lancet Infect. Dis.* 2014, 14, 947–957.
- 279 7. Cano-Portero R, Amillategui-dos Santos R, Boix-Martínez R, Larrauri-Cámara A.  
280 Epidemiology of tuberculosis in Spain. Results obtained by the National Epidemiological  
281 Surveillance Network in 2015. *Enferm Infect Microbiol Clin* 2018;36(3):179–86.

- 282 8. Faksri, K. , Prammananan, T. , Leechawengwongs, M. , Chaiprasert, A. . Molecular  
283 Epidemiology and Drug Resistance of Tuberculous Meningitis. In: Wireko-Brobby, G. ,  
284 editor. Meningitis [Internet]. London: *IntechOpen*; 2012 .
- 285 9. Alarcon F, Escalante L, Perez Y, Banda H, Chacon G, Duenas G. Tuberculous  
286 meningitis. Short course of chemotherapy. *Arch Neurol*. 1990;47(12):1313–7.
- 287 10. Huynh J, Abo Y.-N, du Preez, K, Solomons R, Dooley K.E, Seddon, J.A. Tuberculous  
288 Meningitis in Children: Reducing the Burden of Death and Disability. *Pathogens* 2022,  
289 11, 38.
- 290 11. Mezochow A, Thakur K, Vinnard C. Tuberculous meningitis in children and adults: new  
291 insights for an ancient foe. *Curr Neurol Neurosci Rep* 2017.
- 292 12. Bennett JE. Chronic meningitis. In: Bennett JE, Dolin R, Blaser MJ, eds. Mandell,  
293 Douglas, and Bennett’s. Principles and Practice of Infectious Diseases. Vol 1. 8th ed.  
294 Philadelphia, PA: Elsevier/Saunders; 2015:1138–43; ISBN 978-1-4557-4801-3
- 295 13. Ducomble T, Tolksdorf K, Karagiannis I, Hauer B, Brodhun B, Haas W, et al. The  
296 burden of extrapulmonary and meningitis tuberculosis: an investigation of national  
297 surveillance data, Germany, 2002 to 2009. *Euro Surveill* 2013; 18:.
- 298 14. van Well GT, Paes BF, Terwee CB, Springer P, Roord JJ, Donald PR, et al. Twenty years  
299 of pediatric tuberculous meningitis: a retrospective cohort study in the western cape of  
300 South Africa. *Pediatrics*. 2009;123(1).
- 301 15. Bahr NC, Meintjes G, Boulware DR. Inadequate diagnostics: the case to move beyond  
302 the bacilli for detection of meningitis due to *Mycobacterium tuberculosis*. *J Med*  
303 *Microbiol*. 2019; 68: 755–760
- 304 16. Page MJ, McKenzie JE, Bossuyt PM, Boutron I, Hoffmann TC, Mulrow CD, et al. The  
305 PRISMA 2020 statement: an updated guideline for reporting systematic reviews. *BMJ*  
306 2021;372:n71.
- 307 17. Munn Z, Moola S, Lisy K, Riitano D, Tufanaru C. Methodological guidance for  
308 systematic reviews of observational epidemiological studies reporting prevalence and  
309 incidence data. *Int J Evid Based Healthc*. 2015;13(3):147–153.
- 310 18. Güneş A, Uluca Ü, Aktar F, Konca Ç, Şen V, Ece A, et al. Clinical, radiological and  
311 laboratory findings in 185 children with tuberculous meningitis at a single centre and  
312 relationship with the stage of the disease. *Ital J Pediatr*. 2015 Oct 15;41:75..

- 313 19. Christensen, Andersen, Å, Thomsen, V.Ø. , Andersen PH, Johansen IS. Tuberculous  
314 meningitis in Denmark: a review of 50 cases. *BMC Infect Dis* **11**, 47 (2011).
- 315 20. Goenka A, Jeena PM, Mlisana K, Solomon T, Spicer K, Stephenson R, et al. Rapid  
316 Accurate Identification of Tuberculous Meningitis Among South African Children Using  
317 a Novel Clinical Decision Tool. *Pediatr Infect Dis J*. 2018 Mar;37(3):229-234.
- 318 21. Feng, B., Fei, X., Sun, Y., Zhang X, Shang D, Zhou Y, *et al*. Prognostic factors of adult  
319 tuberculous meningitis in intensive care unit: a single-center retrospective study in East  
320 China. *BMC Neurol* **21**, 308 (2021).
- 321 22. Kee CP, Periyasamy P, Law ZK, Ibrahim NM, WanYahya WNN, Mahadzir H,et al.  
322 Features and Prognostic Factors of Tuberculous Meningitis in a Tertiary Hospital in  
323 Malaysia. *J Infect Dis Epidemiol* .2017;3:028.
- 324 23. Bidstrup C, Andersen PH, Skinhøj P, Andersen ÅB. Tuberculous meningitis in a country  
325 with a low incidence of tuberculosis: still a serious disease and a diagnostic challenge.  
326 *Scandinavian Journal of Infectious Diseases*. 2002;34(11):811-4.
- 327 24. Cíntia Helena de Souza, Ayaka Yamane, Jeison Cleiton Pandini, Luciane Bisognin  
328 Ceretta, Fabiane Ferraz, Glauco Duarte da Luz ,et al. Incidence of tuberculous meningitis  
329 in the State of Santa Catarina, Brazil. *Revista da Sociedade Brasileira de Medicina*  
330 *Tropical* 47(4):483-489, Jul-Aug, 2014.
- 331 25. Wang, DM., Li, QF., Zhu, M. Wu GH, Li X, Xu YH, Zhong J, *et al*. Epidemiological,  
332 clinical characteristics and drug resistance situation of culture-confirmed children TBM  
333 in southwest of China: a 6-year retrospective study. *BMC Infect Dis* **20**, 318 (2020).
- 334 26. Cresswell FV, Tugume L, Bahr NC, Kwizera R, Bangdiwala AS, Musubire AK, et al.  
335 Xpert MTB/RIF Ultra for the diagnosis of HIV-associated tuberculous meningitis: a  
336 prospective validation study. *Lancet Infect Dis*. 2020 Mar;20(3):308-317.
- 337 27. Gijs T. J. van Well, Berbe F. Paes, Caroline B. Terwee, Priscilla Springer, John J. Roord,  
338 et al. Twenty Years of Pediatric Tuberculous Meningitis: A Retrospective Cohort Study  
339 in the Western Cape of South Africa. *Pediatrics* Volume 123, Number 1, January 2009
- 340 28. Lee, H.G., William, T., Menon, J. *et al*. Tuberculous meningitis is a major cause of  
341 mortality and morbidity in adults with central nervous system infections in Kota  
342 Kinabalu, Sabah, Malaysia: an observational study. *BMC Infect Dis* **16**, 296 (2016).

- 343 29. Hoşoğlu S, Geyik MF, Balik I, Aygen B, Erol S, Aygencel SG, et al. Tuberculous  
344 meningitis in adults in Turkey: epidemiology, diagnosis, clinic and laboratory . *Eur J*  
345 *Epidemiol.* 2003;18(4):337-43.
- 346 30. Soria J, Metcalf T, Mori N, Newby RE, Montano SM, Huaroto L, et al. Mortality in  
347 hospitalized patients with tuberculous meningitis. *BMC Infect Dis.* 2019 Jan 5;19(1):9.
- 348 31. Gupta R, Thakur R, Kushwaha S, Jalan N, Rawat P, Gupta P, et al. Isoniazid and  
349 rifampicin heteroresistant Mycobacterium tuberculosis isolated from tuberculous  
350 meningitis patients in India. *Indian J Tuberc.* 2018 Jan;65(1):52-56.
- 351 32. Basu Roy R, Thee S, Blázquez-Gamero D, Falcón-Neyra L, Neth O, Noguera-Julian A,  
352 et al. Performance of immune-based and microbiological tests in children with  
353 tuberculosis meningitis in Europe: a multicentre Paediatric Tuberculosis Network  
354 European Trials Group ( ptbnet) study. *Eur Respir J* 2020; 56: 1902004
- 355 33. Imam YZ, Ahmedullah HS, Akhtar N, Chacko KC, Kamran S, Al Alousi F, et al. Adult  
356 tuberculous meningitis in Qatar: a descriptive retrospective study from its referral center.  
357 *Eur Neurol.* 2015;73(1-2):90-7.
- 358 34. Vinnard C, Winston CA, Wileyto EP, Macgregor RR, Bisson GP. Isoniazid resistance  
359 and death in patients with tuberculous meningitis: retrospective cohort study. *BMJ.* 2010  
360 Sep 6;341:c4451.
- 361 35. Krishnakumariam K, Ellappan K, Muthuraj M, Tamilarasu K, Kumar SV, Joseph NM.  
362 Molecular diagnosis, genetic diversity and drug sensitivity patterns of Mycobacterium  
363 tuberculosis strains isolated from tuberculous meningitis patients at a tertiary care  
364 hospital in South India. *PLoS One.* 2020 Oct 5;15(10):e0240257.
- 365 36. Patel VB, Padayatchi N, Bhigjee AI, Allen J, Bhagwan B, Moodley AA, et al. Multidrug-  
366 resistant tuberculous meningitis in KwaZulu-Natal, South Africa. *Clin Infect Dis.* 2004  
367 Mar 15;38(6):851-6.
- 368 37. Wang, T., Feng, GD., Pang, Y., Liu JY, Zhou Y, Yang YN, et al. High rate of drug  
369 resistance among tuberculous meningitis cases in Shaanxi province, China. *Sci Rep* 6,  
370 25251 (2016).
- 371 38. Zhang J, Hu X, Hu X, Ye Y, Shang M, An Y, et al. Clinical features, Outcomes and  
372 Molecular Profiles of Drug Resistance in Tuberculous Meningitis in non-HIV Patients.  
373 *Sci Rep.* 2016 Jan 7;6:19072.

- 374 39. Kumar K, Giribhattanavar P, Chandrashekar N, Patil S. Correlation of clinical, laboratory  
375 and drug susceptibility profiles in 176 patients with culture positive TBM in a tertiary  
376 neurocare centre. *Diagn Microbiol Infect Dis*. 2016 Dec;86(4):372-376.
- 377 40. Nguyen DT, Agarwal S, Graviss EA .Trends of tuberculosis meningitis and associated  
378 mortality in Texas, 2010-2017, a large population based analysis. *PLoS ONE* 2019;14(2):  
379 e0212729
- 380 41. Miftode EG, Dorneanu OS, Leca DA, Juganariu G, Teodor A, Hurmuzache M, et al.  
381 Tuberculous Meningitis in Children and Adults: A 10- Year Retrospective Comparative  
382 Analysis. *PLoS ONE* .2015;10(7): e0133477
- 383 42. Erdem H, Ozturk-Engin D, Elaldi N, Gulsun S, Sengoz G, Crisan A, et al. The  
384 microbiological diagnosis of tuberculous meningitis: results of Haydarpasa-1 study. *Clin*  
385 *Microbiol Infect*. 2014 Oct;20(10):O600-8.
- 386 43. Pehlivanoglu F, Yasar KK, Sengoz G. Tuberculous meningitis in adults: a review of 160  
387 cases. *ScientificWorldJournal*. 2012;2012:169028.
- 388 44. Kaviyil JE, Ravikumar R. Diagnosis of tuberculous meningitis: Current scenario from a  
389 Tertiary Neurocare Centre in India. *Indian J Tuberc*. (2017)
- 390 45. Chaidir L, Annisa J, Dian S, Parwati I, Alisjahbana A, Purnama F, et al. Microbiological  
391 diagnosis of adult tuberculous meningitis in a ten-year cohort in Indonesia. *Diagn*  
392 *Microbiol Infect Dis*. 2018 May;91(1):42-46.
- 393 46. García-Grimshaw M, Gutiérrez-Manjarrez FA, Navarro-Álvarez S, González-Duarte A.  
394 Clinical, Imaging, and Laboratory Characteristics of Adult Mexican Patients with  
395 Tuberculous Meningitis: A Retrospective Cohort Study. *J Epidemiol Glob Health*. 2020  
396 Mar;10(1):59-64.
- 397 47. Nhu NT, Heemskerk D, Thu do DA, Chau TT, Mai NT, Nghia HD, et al. Evaluation of  
398 GeneXpert MTB/RIF for diagnosis of tuberculous meningitis. *J Clin Microbiol*. 2014  
399 Jan;52(1):226-33.
- 400 48. Rufai SB, Singh A, Singh J, Kumar P, Sankar MM, Singh S.. Diagnostic usefulness of  
401 Xpert MTB/RIF assay for detection of tuberculous meningitis using cerebrospinal fluid. *J*  
402 *Infect*. 2017 Aug;75(2):125-131.

- 403 49. Ming-Gui Wang , Lan Luo , Yunxia Zhang, Xiangming Liu, Lin Liu and Jian-Qing He.  
404 Treatment outcomes of tuberculous meningitis in adults: a systematic review and meta-  
405 analysis. *BMC Pulmonary Medicine* (2019) 19:200.
- 406 50. Henriksen MJV, Wienecke T, Thagesen H, Jacobsen RVB, Subhi Y, Ringsted C, Konge  
407 L. Assessment of Residents Readiness to Perform Lumbar Puncture: A Validation Study.  
408 *J Gen Intern Med.* 2017 Jun;32(6):610-618.
- 409 51. Siddiqi OK, Birbeck GL, Ghebremichael M, Mubanga E, Love S, Buback C, et al.  
410 Prospective Cohort Study on Performance of Cerebrospinal Fluid (CSF) Xpert MTB/RIF,  
411 CSF Lipoarabinomannan (LAM) Lateral Flow Assay (LFA), and Urine LAM LFA for  
412 Diagnosis of Tuberculous Meningitis in Zambia. *J Clin Microbiol.* 2019 Jul  
413 26;57(8):e00652-19.
- 414 52. Garg RK. Microbiological diagnosis of tuberculous meningitis: Phenotype to genotype.  
415 *Indian J Med Res.* 2019 Nov;150(5):448-457
- 416 53. Marais S, Thwaites G, Schoeman JF, Toeroek ME, Misra UK, Prasad K, et al.  
417 Tuberculous meningitis: a uniform case definition for use in clinical research. *Lancet*  
418 *Infect Dis.* 2010;10(11):803 –12
- 419 54. Bahr NC, Meintjes G, Boulware DR. 2019. Inadequate diagnostics: the case to move  
420 beyond the bacilli for detection of meningitis due to *Mycobacterium tuberculosis*. *J Med*  
421 *Microbiol* 68:755–760.
- 422 55. Stadelman AM, Ellis J, Samuels THA, Mutengesa E, Dobbin J, Ssebambulidde K, et al.  
423 Treatment Outcomes in Adult Tuberculous Meningitis: A Systematic Review and Meta-  
424 analysis. *Open Forum Infect Dis.* 2020 Jun 30;7(8):ofaa257.
- 425 56. Miftode EG, Dorneanu OS, Leca DA, Juganariu G, Teodor A, Hurmuzache M, et al.  
426 Tuberculous Meningitis in Children and Adults: A 10-Year Retrospective Comparative  
427 Analysis. *PLoS One.* 2015 Jul 17;10(7):e0133477.
- 428 57. Vinnard C, Macgregor RR. Tuberculous meningitis in HIV-infected individuals. *Curr*  
429 *HIV/AIDS Rep.* 2009 Aug;6(3):139-45)
- 430 58. Tavares AM, Fronteira I, Couto I, Machado D, Viveiros M, Abecasis AB, et al. HIV and  
431 tuberculosis co-infection among migrants in Europe: a systematic review on the  
432 prevalence, incidence and mortality. *PLoS One.* 2017;12(9): e0185526. 35.

433 59. Gupta RK, Lucas SB, Fielding KL, Lawn SD. Prevalence of tuberculosis in post-mortem  
434 studies of HIV-infected adults and children in resource-limited settings: a systematic  
435 review and meta-analysis. *AIDS*. 2015;29(15):1987 – 2002.

436

437

438

439

440

441

442

443

444

445

446

447

448

449

450

451

452

453

454

455

456

457

458



459

460 **Figures**

461

462

463

464

465

466

467

468

469

470

471

472

473

474

475 Figure.1 Flow diagram of systematic search of studies for this systematic review and meta-  
476 analysis.

477

478

479

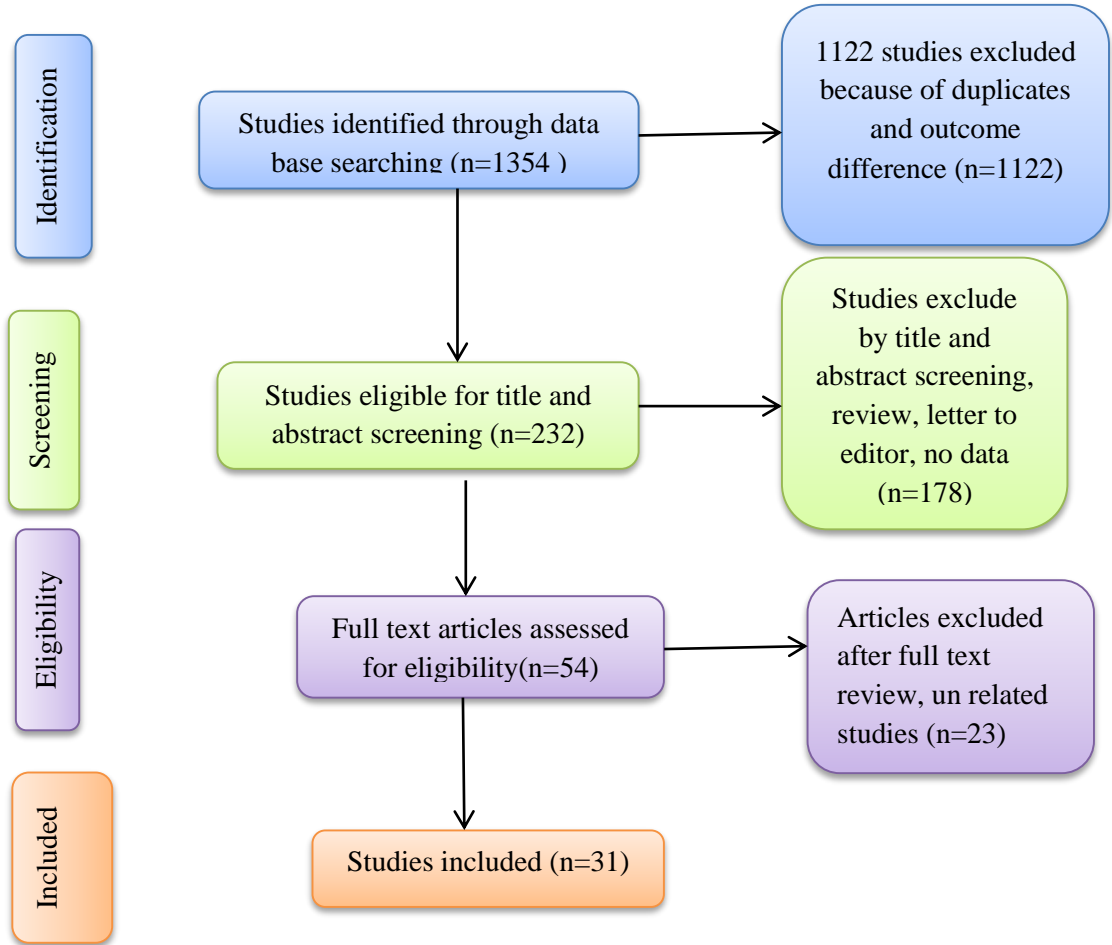

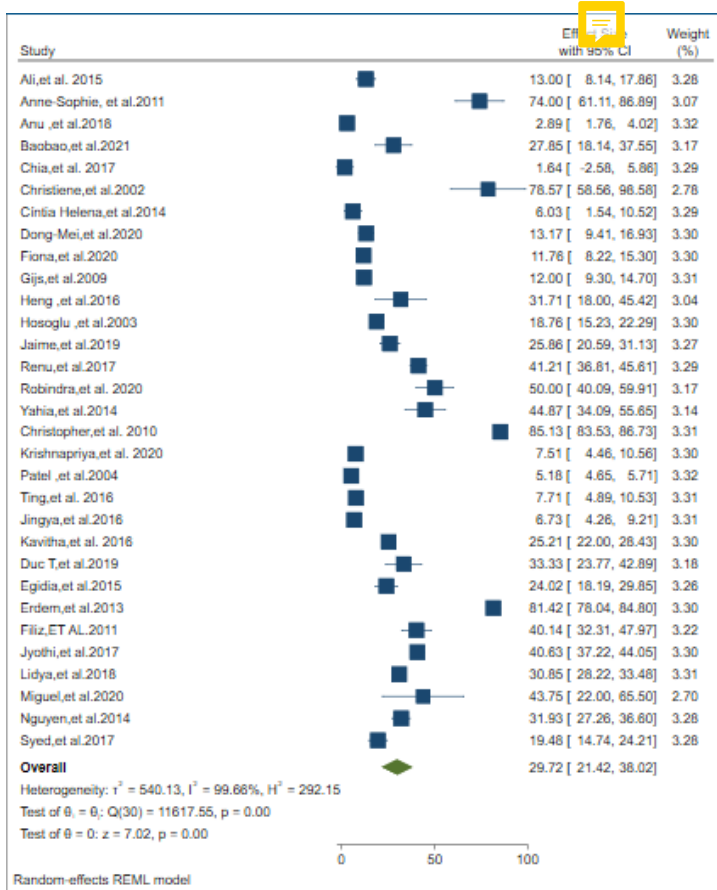

480

481 Figure.2 CSF Culture confirmed Tuberculosis meningitis among suspected patients

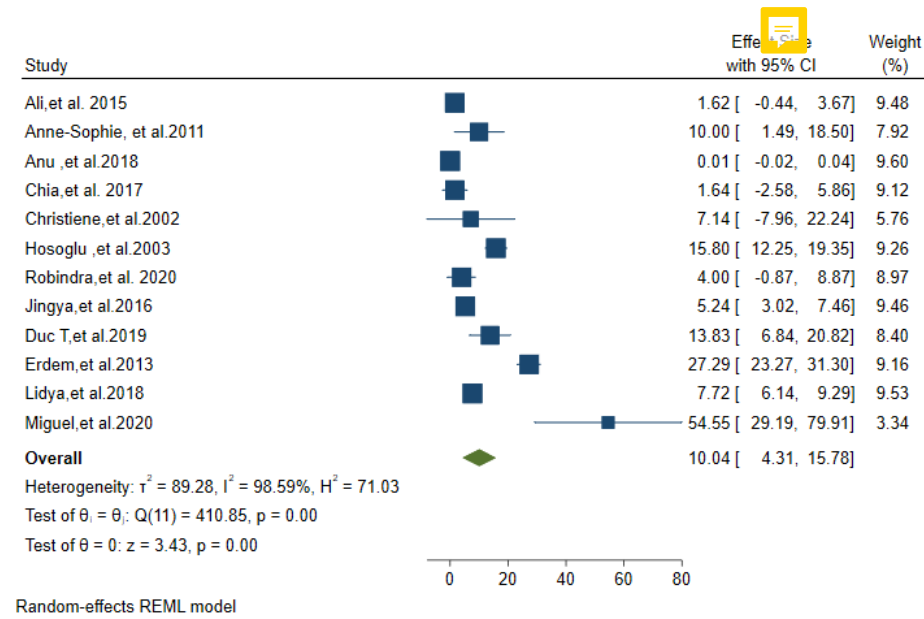

482

483 Figure.3 ZN AFB microscopy positivity of CSF in TBM suspected patients

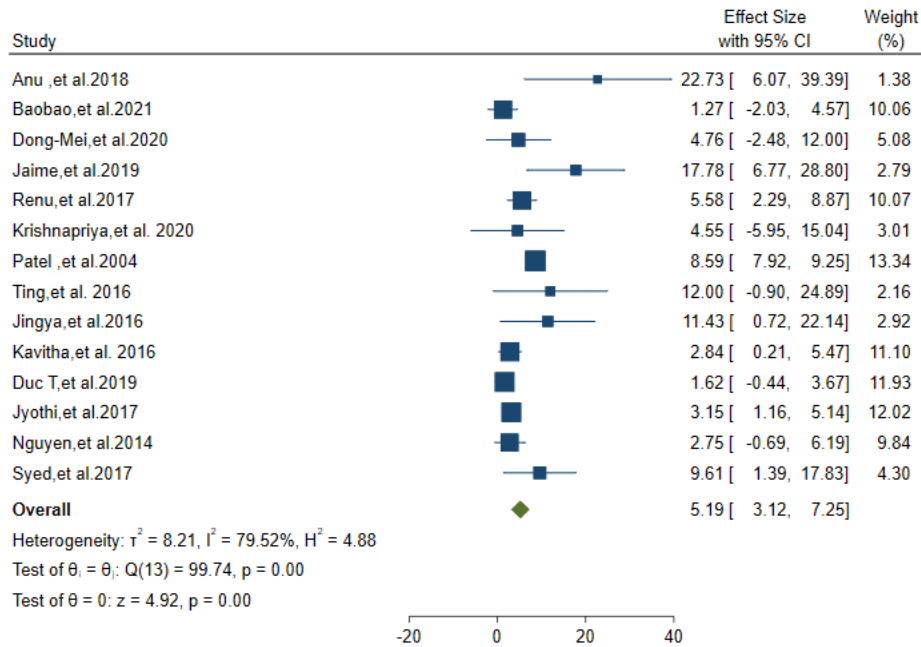

484 Random-effects REML model

485 Figure.4 Pooled estimate of MDR-TB prevalence in Tuberculosis confirmed isolates.

486

487

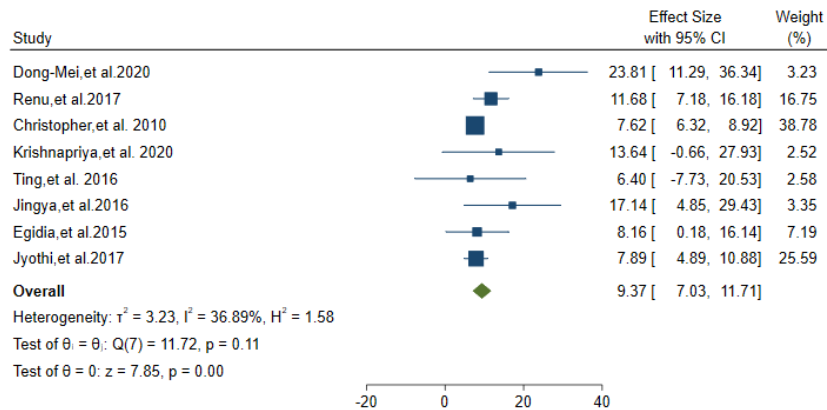

488 Random-effects REML model

489

490 Figure.5 prevalence of INH mono resistance in Tuberculosis meningitis confirmed isolates.

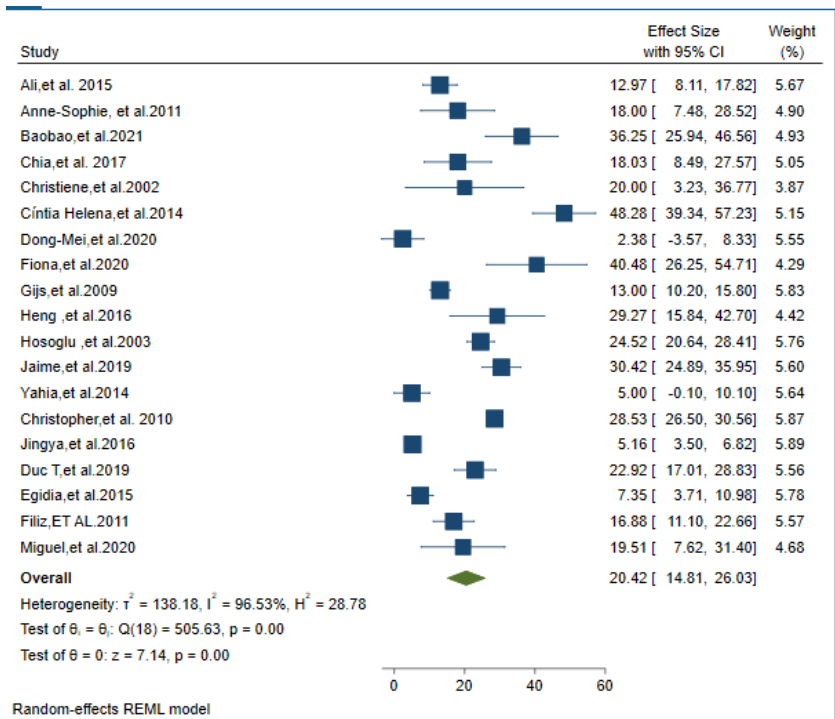

491

492

493 Figure.6 Mortality among Tuberculosis meningitis suspected patients.

494

495

496

497

498

499

500

501

502

503

504

505 Table 1. Study characteristic of included studies.

| Author_year                  | Country              | Study period                       | Study design  | Participant age      | Sample size |
|------------------------------|----------------------|------------------------------------|---------------|----------------------|-------------|
| Ali,et al. 2015(18)          | Diyarbakir Turkey    | 1998 to 2008                       | Retrospective | <18                  | 185 TBM     |
| Anne-Sophie, et al.2011(19)  | Denmark              | January 2000 to December 2008      | Retrospective | All age              | 50 TBM      |
| Anu ,et al.2018(20)          | S/Africa             | 2010-2014                          | Retrospective | 3 months-15 years    | 865 TBM     |
| Baobao,et al.2021(21)        | Shandong , China     | January 2008 to April 2018.        | Retrospective | >18                  | 80 TBM      |
| Chia,et al. 2017(22)         | Kebangsaa n Malaysia | January 2003 to February 2015      | Observational | >18                  | 61 TBM      |
| Christiene,et al.2002(23)    | Denmark              | 1988 to July 2000.                 | Retrospective | All age              | 20 TBM      |
| Cíntia Helena,et al.2014(24) | Brazil               | 2001 to 2010                       | Descriptive   | All age              | 116 TBM     |
| Dong-Mei,et al.2020(25)      | Southwest of China   | January 2013 to December 2018      | Retrospective | < 14 years old       | 319 TBM     |
| Fiona,et al.2020(26)         | Uganda               | Nov 25, 2016, to Jan 24, 2019      | Retrospective | >18                  | 204TBM      |
| Gijs,et al.2009(27)          | South Africa         | January 1985 to April 2005         | Retrospective | <18                  | 554TBM      |
| Heng ,et al.2016(28)         | Sabah, Malaysia      | February 2012 to March 2013        | cohort        | >12                  | 84 TBM      |
| Hosoglu ,et al.2003(29)      | Turkey               | 1985 to 1998                       | Retrospective | >18                  | 469TBM      |
| Jaime,et al.2019(30)         | Peru                 | 2006 to 2015                       | Retrospective | >18                  | 263TBM      |
| Renu,et al.2017(31)          | India                | July 2012 to July 2015             | Prospective   | All age              | 197 TBM     |
| Robindra,et al. 2020(32)     | Europe               | February 2016 to August 2016       | Retrospective | 0–16 years           | 118 TBM     |
| Yahia,et al.2014(33)         | Qatar                | January 2006 to December 2012      | Retrospective | >18                  | 80 TBM      |
| Christopher,et al. 2010(34)  | USA                  | 1 January 1993 to 31 December 2005 | Retrospective | All age              | 1896TBM     |
| Krishnapriya,et al. 2020(35) | South India          | August 2018 to February 2020       | Observational |                      | 293 TBM     |
| Patel ,et al.2004(36)        | S/Africa             | 1999 through 2002                  | Retrospective | All age              | 6762TBM     |
| Ting,et al. 2016(37)         | Shaanxi ,China       | September 2010 to December 2012    | Retrospective | All age              | 350 TBM     |
| Jingya,et al.2016(38)        | southwest China      | -                                  | -             | 11 to 84             | 401 TBM     |
| Kavitha,et al. 2016(39)      | India                | May 2013 – April 2014              | Prospective   | 3 months to 70 years | 698 TBM     |
| Duc T,et al.2019(40)         | America              | 01/2010 to 12/2017                 | Retrospective | All age              | 192 TBM     |
| Egidia,et al.2015(41)        | Romania              | 2004 to 2013                       | Retrospective | All age              | 204 TBM     |
| Erdem,et al.2013(42)         | Multi-country        | 2000 to 2012.                      | Retrospective | All age              | 506 TBM     |
| Filiz,et al.2011(43)         | Turkey               | 1998 to 2009                       | Retrospective | >14                  | 160 TBM     |

|                       |           |                                   |               |         |          |
|-----------------------|-----------|-----------------------------------|---------------|---------|----------|
|                       |           |                                   | ve            |         |          |
| Jyothi,et al.2017(44) | India     | 2009 to 2014                      | Retrospective | All age | 790 TBM  |
| Lidya,et al.2018(45)  | Indonesia | 2006 to 2016                      | Cohort        | >18     | 1180 TBM |
| Miguel,et al.2020(46) | Mexico    | January 2015 to March2018         | Retrospective | ≥18     | 41 TBM   |
| Nguyen,et al.2014(47) | Vietnam   | 17 April 2011 to 31 December 2012 | Retrospective | >18     | 379 TBM  |
| Syed,et al.2017(48)   | India     | 2013 to 2015                      | -             | >18     | 267 TBM  |

506

507 Table. 2 Sub group analysis of Mortality

| Characteristic     | Number of studies | Number of deaths | Proportion of death (95% CI) |
|--------------------|-------------------|------------------|------------------------------|
| <b>Age</b>         |                   |                  |                              |
| <18 years          | 3                 | 95               | 9.80 (3.22-16.37)            |
| ≥18 years          | 7                 | 277              | 24.82 (17.05-32.59)          |
| <b>Study type</b>  |                   |                  |                              |
| Retrospective      | 17                | 1076             | 20.34 (14.03-26.65)          |
| other study design | 4                 | 160              | 30.92(18.40-43.44)           |
| <b>HIV status</b>  |                   |                  |                              |
| Positive*          | 4                 | 220              | 53.39 (40.55-66.24)          |
| Negative*          | 4                 | 173              | 21.65 (4.27-39.03)           |

508 Note: \*primary studies conducted mortality rate among HIV positive were Jaime,et al.2019; Christopher,et al. 2010;  
509 Cecchini,et al.2009 and Fiona,et al.2020.

510 \*Primary studies conducted mortality rate among HIV negative were: Jaime,et al.2019; Christopher,et al. 2010;  
511 Cecchini,et al.2009 and Jingya,et al.2016

512

513

514

515

516

517

518

519

520

521 **Supplementary Information**

## 522 Supplementary Table 1. PRISMA checklist for systematic review and meta-analysis

523

| <b>Section and Topic</b> | <b>Item #</b> | <b>Checklist item</b>                                                                                                                                                                                                                                                                                | <b>The location where item is reported</b> |
|--------------------------|---------------|------------------------------------------------------------------------------------------------------------------------------------------------------------------------------------------------------------------------------------------------------------------------------------------------------|--------------------------------------------|
| <b>TITLE</b>             |               |                                                                                                                                                                                                                                                                                                      |                                            |
| Title                    | 1             | Identify the report as a systematic review.                                                                                                                                                                                                                                                          | i                                          |
| <b>ABSTRACT</b>          |               |                                                                                                                                                                                                                                                                                                      |                                            |
| Abstract                 | 2             | See the PRISMA 2020 for Abstracts checklist.                                                                                                                                                                                                                                                         | ii                                         |
| <b>INTRODUCTION</b>      |               |                                                                                                                                                                                                                                                                                                      |                                            |
| Rationale                | 3             | Describe the rationale for the review in the context of existing knowledge.                                                                                                                                                                                                                          | 1                                          |
| Objectives               | 4             | Provide an explicit statement of the objective(s) or question(s) the review addresses.                                                                                                                                                                                                               | 2                                          |
| <b>METHODS</b>           |               |                                                                                                                                                                                                                                                                                                      |                                            |
| Eligibility criteria     | 5             | Specify the inclusion and exclusion criteria for the review and how studies were grouped for the syntheses.                                                                                                                                                                                          | 3                                          |
| Information sources      | 6             | Specify all databases, registers, websites, organisations, reference lists and other sources searched or consulted to identify studies. Specify the date when each source was last searched or consulted.                                                                                            | 2                                          |
| Search strategy          | 7             | Present the full search strategies for all databases, registers and websites, including any filters and limits used.                                                                                                                                                                                 | 2                                          |
| Selection process        | 8             | Specify the methods used to decide whether a study met the inclusion criteria of the review, including how many reviewers screened each record and each report retrieved, whether they worked independently, and if applicable, details of automation tools used in the process.                     | 2                                          |
| Data collection process  | 9             | Specify the methods used to collect data from reports, including how many reviewers collected data from each report, whether they worked independently, any processes for obtaining or confirming data from study investigators, and if applicable, details of automation tools used in the process. | 3                                          |
| Data items               | 10a           | List and define all outcomes for which data were                                                                                                                                                                                                                                                     | 3                                          |

| <b>Section and Topic</b>      | <b>Item #</b> | <b>Checklist item</b>                                                                                                                                                                                                                                             | <b>The location where item is reported</b> |
|-------------------------------|---------------|-------------------------------------------------------------------------------------------------------------------------------------------------------------------------------------------------------------------------------------------------------------------|--------------------------------------------|
|                               |               | sought. Specify whether all results that were compatible with each outcome domain in each study were sought (e.g. for all measures, time points, analyses), and if not, the methods used to decide which results to collect.                                      |                                            |
|                               | 10b           | List and define all other variables for which data were sought (e.g. participant and intervention characteristics, funding sources). Describe any assumptions made about any missing or unclear information.                                                      | 3                                          |
| Study risk of bias assessment | 11            | Specify the methods used to assess risk of bias in the included studies, including details of the tool(s) used, how many reviewers assessed each study and whether they worked independently, and if applicable, details of automation tools used in the process. | 4                                          |
| Effect measures               | 12            | Specify for each outcome the effect measure(s) (e.g. risk ratio, mean difference) used in the synthesis or presentation of results.                                                                                                                               | 4                                          |
| Synthesis methods             | 13a           | Describe the processes used to decide which studies were eligible for each synthesis (e.g. tabulating the study intervention characteristics and comparing against the planned groups for each synthesis (item #5)).                                              | 4                                          |
|                               | 13b           | Describe any methods required to prepare the data for presentation or synthesis, such as handling of missing summary statistics, or data conversions.                                                                                                             | 4                                          |
|                               | 13c           | Describe any methods used to tabulate or visually display results of individual studies and syntheses.                                                                                                                                                            | 3                                          |
|                               | 13d           | Describe any methods used to synthesize results and provide a rationale for the choice(s). If meta-analysis was performed, describe the model(s), method(s) to identify the presence and extent of statistical heterogeneity, and software package(s) used.       | 4                                          |
|                               | 13e           | Describe any methods used to explore possible causes of heterogeneity among study results (e.g. subgroup analysis, meta-regression).                                                                                                                              | 4                                          |
|                               | 13f           | Describe any sensitivity analyses conducted to assess robustness of the synthesized results.                                                                                                                                                                      | 4                                          |
| Reporting bias                | 14            | Describe any methods used to assess risk of bias due                                                                                                                                                                                                              | 4                                          |



| <b>Section and Topic</b>      | <b>Item #</b> | <b>Checklist item</b>                                                                                                                                                                                                                                                                | <b>The location where item is reported</b> |
|-------------------------------|---------------|--------------------------------------------------------------------------------------------------------------------------------------------------------------------------------------------------------------------------------------------------------------------------------------|--------------------------------------------|
| assessment                    |               | to missing results in a synthesis (arising from reporting biases).                                                                                                                                                                                                                   |                                            |
| Certainty assessment          | 15            | Describe any methods used to assess certainty (or confidence) in the body of evidence for an outcome.                                                                                                                                                                                | 4                                          |
| <b>RESULTS</b>                |               |                                                                                                                                                                                                                                                                                      |                                            |
| Study selection               | 16a           | Describe the results of the search and selection process, from the number of records identified in the search to the number of studies included in the review, ideally using a flow diagram.                                                                                         | 4                                          |
|                               | 16b           | Cite studies that might appear to meet the inclusion criteria, but which were excluded, and explain why they were excluded.                                                                                                                                                          | 5                                          |
| Study characteristics         | 17            | Cite each included study and present its characteristics.                                                                                                                                                                                                                            | 5                                          |
| Risk of bias in studies       | 18            | Present assessments of risk of bias for each included study.                                                                                                                                                                                                                         | 6                                          |
| Results of individual studies | 19            | For all outcomes, present, for each study: (a) summary statistics for each group (where appropriate) and (b) an effect estimate and its precision (e.g. confidence/credible interval), ideally using structured tables or plots.                                                     | N/A                                        |
| Results of syntheses          | 20a           | For each synthesis, briefly summarise the characteristics and risk of bias among contributing studies.                                                                                                                                                                               | N/A                                        |
|                               | 20b           | Present results of all statistical syntheses conducted. If meta-analysis was done, present for each the summary estimate and its precision (e.g. confidence/credible interval) and measures of statistical heterogeneity. If comparing groups, describe the direction of the effect. | 10                                         |
|                               | 20c           | Present results of all investigations of possible causes of heterogeneity among study results.                                                                                                                                                                                       | 10                                         |
|                               | 20d           | Present results of all sensitivity analyses conducted to assess the robustness of the synthesized results.                                                                                                                                                                           | 10                                         |
| Reporting biases              | 21            | Present assessments of risk of bias due to missing results (arising from reporting biases) for each synthesis assessed.                                                                                                                                                              | N/A                                        |
| Certainty of                  | 22            | Present assessments of certainty (or confidence) in the                                                                                                                                                                                                                              | 11                                         |

| <b>Section and Topic</b>                       | <b>Item #</b> | <b>Checklist item</b>                                                                                                                                                                                                                      | <b>The location where item is reported</b> |
|------------------------------------------------|---------------|--------------------------------------------------------------------------------------------------------------------------------------------------------------------------------------------------------------------------------------------|--------------------------------------------|
| evidence                                       |               | body of evidence for each outcome assessed.                                                                                                                                                                                                |                                            |
| <b>DISCUSSION</b>                              |               |                                                                                                                                                                                                                                            |                                            |
| Discussion                                     | 23a           | Provide a general interpretation of the results in the context of other evidence.                                                                                                                                                          | 15                                         |
|                                                | 23b           | Discuss any limitations of the evidence included in the review.                                                                                                                                                                            | 17                                         |
|                                                | 23c           | Discuss any limitations of the review processes used.                                                                                                                                                                                      | 17                                         |
|                                                | 23d           | Discuss implications of the results for practice, policy, and future research.                                                                                                                                                             | 16                                         |
| <b>OTHER INFORMATION</b>                       |               |                                                                                                                                                                                                                                            |                                            |
| Registration and protocol                      | 24a           | Provide registration information for the review, including register name and registration number, or state that the review was not registered.                                                                                             | N/A                                        |
|                                                | 24b           | Indicate where the review protocol can be accessed, or state that a protocol was not prepared.                                                                                                                                             | Not prepared                               |
|                                                | 24c           | Describe and explain any amendments to information provided at registration or in the protocol.                                                                                                                                            | N/A                                        |
| Support                                        | 25            | Describe sources of financial or non-financial support for the review, and the role of the funders or sponsors in the review.                                                                                                              | 4                                          |
| Competing interests                            | 26            | Declare any competing interests of review authors.                                                                                                                                                                                         | 17                                         |
| Availability of data, code and other materials | 27            | Report which of the following are publicly available and where they can be found: template data collection forms; data extracted from included studies; data used for all analyses; analytic code; any other materials used in the review. | 18                                         |

524

525

526

527

528

529



## Point-by point response

1. Reference is corrected according to the journal guideline. Please see reference part page 10

2. line 10 - 'studies that reported culture confirmed TBM' this needs to be corrected - the aim was not to search for culture confirmed studies, the aim was to search for presumed/suspected TBM and then estimate the proportion that were culture confirmed

✓ Yes the comment is correct and it is corrected as '...studies that reported presumed TBM patients'. See abstract part page 1.

3. Line 33 - 10 million cases of TB were detected - the WHO estimate is of burden (everyone who developed TB), detection is much lower and dropped further due to COVID disruptions

✓ This editorial error is corrected as '...the number of people newly diagnosed with TB dropped to 5.8 million..'see page 1

4. Line 68 - add some detail around the expertise and skill required to collect CSF by lumbar puncture (as in your previous response)

✓ Some of the skills and requirements for CSF collection are added to the manuscript .see page 2 line 72-74

5. Line 94-95 the definition is not clear - what is this the definition for?

✓ Since the operational definition is still ambiguous we want to omit from the manuscript.

6. The discussion requires additional details on the limitations - you may either include these as you discuss the findings or expand the limitations paragraph. These should include:  
- trained personnel - for what taking CSF, testing CSF, where is this limited? Any publications that confirm this?

✓ In the discussion section we added some discussion on trained personnel and limited skill on taking CSF from lumbar puncture with references. See page 7 line 186-191

- Rate of DR TB - this was only possible in subset of n=XX studies. Also check was these in a particular region and does this DR TB rate reflect underlying DR TB pattern in that region?

- ✓ The following sentence is added to the discussion part under rate of MDR-TB. '...Since most of the included studies to analyze drug resistance pattern were from Asia (5 from India, 4 from china and 1 from Vietnam), the result reflects drug resistance pattern in that specific region.

- HIV TBM mortality - study not able to stratify by CD4 count or ART use; also comment on the study period, could the high HIV TBM be because it occurred in period prior to widespread ART?

- ✓ Majority of the included studies were done after the initiation of antiretroviral treatment in most of developed and developing countries. See page 8 line 221-223

7. Figures - the heading effect size has not been changed as previously recommended and noted in the responses

- ✓ Sorry for the first response ,now it is corrected .please see each figures in the corresponding pages

8. Table 2: please annotate this table so that the HIV studies are specified. Add a footnote so that we can see which of the 4 studies were HIV+ and which were HIV- . The detail on age and study design is in table 1

- ✓ Footnote is added to Table 2.please see page 21 for details.

9.Minor notes which reflect the need for copyediting and proof reading - the use of Mycobacterium tuberculosis (Mtb) - this needs consistency across the manuscript - please check nomenclature and adjust (lines 32, 35, 46, 61, 185, 195, 205 etc)

- ✓ All the nomenclatures were corrected according to the comment

-TBM to be used consistently

- ✓ We make all the words consistent thought the document

Incorrect capitalization of words - line 53 Infants; line 72 Absence; line 185 Worldwide, line 197 Smear

Check tenses throughout: line 108 'is' should be was

Language: line 156 'further analysis the drug resistance'; line 176 'than expected'; line 179

'definite diagnostic'; line 180 'were got'; line 181-182; line 189 'makes doubt its use';

Line 139 S/Africa needs to be spelled out; line 195 AF

line 139 continent could be deleted

line 143 'rest studies'

- ✓ Capitalization and grammar is corrected throughout the document
